# Supplementary material for: Community perceptions and experiences of a non-pyrethroid insecticide-treated wall lining (ITWL) for malaria control in Tanzania: A qualitative study
Source: Research Square preprint supplement (doi:10.21203/rs.3.rs-6204064/v1), 2025-04-01
Supplement: Supplementary file 1 [file b83520da086bcdd8bfeec1b6.docx]

1. **Focus Group discussion topic guide – Pre ITWL Installation phase**

| **DOMAIN** | **PROBES** |
| --- | --- |
| Malaria-(risks of malaria) | What illnesses do you commonly experience these days, say in the past six months?  If malaria is mentioned, probe further for:  • Definitions of malaria  • How malaria feels  • How you recognize malaria  • Frequency of malaria attacks  • Probe on the difference between malaria and fever  How do you feel about getting malaria?  • Probe further for reasons they do or do not expect malaria |
| Seeking treatment and Prevention (for mothers and children)- | What measures do you personally take once you recognize you have malaria?   - Whom do they approach for advice? - Where do they seek treatment - If they go to health facilities, traditional healers or pharmacy probe further - At what stage of the disease do they seek treatment/help, and why - Whether a kind of malaria is suited for a different treatment approach   How do you decide if and how you should treat malaria symptoms?   - *If costs are mentioned, probe further* - *Probe for what makes one malaria treatment better than another*   What measures do you take once you sense that your child has fever? (Repeat the probes above) |
| Malaria control | What do you do to prevent yourself from malaria?  • What is their source of information about malaria control  • Mention malaria control approaches you are aware about  When are these methods best used?  • If nets or wall liners is mentioned probe further  • Which method do you consider the best and why?  o If nets are mentioned probe if they are for re-treatment or LLINS  o Probe in detail their knowledge and use of nets in the community (their availability per household, quality of the nets, effectiveness in hanging, color preferences, perceptions on their effectiveness, nets distribution campaigns, etc)   - If wall liners is mentioned query where they received information about it how and why they think it is better compared to nets   Ask how it is important/ priority to protect from malaria   - If malaria prevention appears not as important probe for reasons - Probe on the discrepancies between prevention measures and their none use   **[Malaria control for other household members]**  What do you do to prevent your children from malaria?   - What is their source of information about malaria prevention to family members - Mention malaria control approaches for their families they are aware about - Which method do you consider the best and why?   - If nets are mentioned probe if they are for re-treatment or LLINS   When are these methods best used?   - If nets or wall liners is mentioned probe further   Ask how it is important to protect their family from malaria   - If malaria prevention appears not as important probe for reasons - Probe the emphasis on prevention between adults and children under fives - Probe on the discrepancies between prevention measures and their none use   Probe on the discrepancies between prevention measures and their none use |
| Sensitization process | Ask if they have received any information about incoming project research for the control of mosquitoes that transmit malaria.  What is your opinion regarding the sensitization process conducted by researchers before the commencement of insecticide spraying/ wall liners installation in your houses for mosquito control?  • Whether information about the project has reached them  • What information they received  • How do they feel they were well involved to participate  Do you think community members have well received the research project on wall liners installment for mosquito control?  • What did you think would be the benefits and disadvantages of being in the trial? |
| Opinion on the proposed project main tool | Explain to the respondent about what the project is about to introduce (wall liners) and here his/her opinion on the method?  Probes: whether they prefer the tool better, concurrently, or without the use of bed-nets (let it come out during the discussion)  Specifically, comparatively to LLINs which do you think will be best to protect the household members from mosquitoes and malaria? |
| Summary and close | Summarise the main points of the participant checking their agreement and asking if they have anything more to add).  Are there any points you think I’ve missed, or any other issues you’d like to talk about regarding malaria and its control measures? |

1. **FGD Guide- Post ITWL installation Phase**
2. What is your overall understanding about Durable wall liner (ITWL)?

Probe: The understanding about the product and its expected function in the house.

1. What is your overall impression of the wall lining product? What did you like? What did you not like?
2. Do you feel you received enough information about the wall lining from the community meeting or installers? Did you receive a user manual with a Kiswahili translation?
3. Where you affected anyhow by the ITWL installation exercise in your home?

- Ask if the any kind of domestic activity had to stop for a while to allow the installation to take place?
- Probe; If the installation exercise took so long than expected, how did they feel about it?

1. Where you comfortable your house to be installed with someone from your village?

- Where the installation team would you like to be taken from, and why?

1. What did you think about the installation using nails (roofing nails, concrete nails)? Do you think nails are the best installation material? Are there other fixing materials you would like to be used?
2. We observed some of the community members refusing to have their houses installed with ITWL, why do you think that happened?

- Probe: All possible reasons they think it caused some people to refuse the intervention?

1. In some houses we observed the wall lining became dusty/dirty over time. Is this a problem?

- When it gets dusty, how do you want to clean it? With what? And how often?

1. Did you experienced any challenges in cleaning and maintaining the installed materials in your houses?

- What did you do to overcome the challenges
- Do you think it was who responsibility to clean and maintain the materials

1. In some circumstance people complained to experience some adverse events, was it common to everyone?

- What kind of adverse events were they experienced by the people?
- How did they respond to it?

1. Are there any observable changes in your houses after the ITWL installation?

How do you comment about ventilation status inside the ITWL installed houses?

- Did you observed any changes on mosquito inside the house after the installation when compared with the pre installation?
- Why do you think you had such as an experience? was it because of the installation or the type of your house?

1. After the installation of ITWL, did you continued to sleep under the Mosquito nets? Why?

- Do you think it is practical to use both ITWL and ITN’s together in all season of the year? Please explain your answer.

1. The wall lining you received was blue. I have some other samples (light/dark blue, light/dark green and brown).

- Which colour do you prefer and why? (with a show of hands count number of people who prefer each colour)

1. How do you comment on the house look after the installation of the ITWL materials?

- Probe: For how long would they like to have the wall liners hanging on the walls of their houses?
- Ask: If they would like to have them even, they get too dirty, why?

1. Your feedback helps us improve the product. Is there anything else you would like to share about your experience with the wall lining that was installed in your home?
2. **In-Depth Interview Topic Guide- Pre ITWL Installation**

Target group: Village Leaders/ opinion shapers, community health workers (CHW’s), installers and supervisors from the community

| **Domain** | **Topic and Probes** *(in italics)* |
| --- | --- |
| Warm up | 1. I would like to hear a bit about your job/ activities. Can you tell me what your position in the society is and your role on health issues? |
| Malaria- (risks of malaria) | What illnesses do people in your community commonly complain about? Say in the past six months?  *If malaria is mentioned, probe further for:*   - *Definitions of malaria* - *How malaria feels* - *How you recognize malaria* - *Frequency of malaria attacks* - *Probe on the difference between malaria and fever*   Personally, how do you feel about getting malaria?   - *Probe further for reasons they do or do not expect malaria* |
| Seeking treatment | What measures do people in your community take once they feel having malaria?   - Whom do they approach for advice? - Where do they seek treatment - If they go to health facilities, traditional healers or pharmacy probe further - At what stage of the disease do they seek treatment/help, and why - Whether a kind of malaria is suited for a different treatment approach   How do people decide if and how they should treat malaria symptoms?   - *If costs are mentioned, probe further* - *Probe for what makes one malaria treatment better than another*   What measures do you take once you sense that your child has fever? (repeat the probes above) |
| Malaria control | What do you do to prevent yourself from malaria?   - What is their source of information about malaria control - Mention malaria control approaches you are aware about   When are these methods best used?   - If nets or Wall liners is mentioned probe further - Which method do you consider the best and why?   - If nets are mentioned probe if they are for re-treatment or LLINS   - Probe in detail their knowledge and use of nets in the community (their availability per household, quality of the nets, effectiveness in hanging, color preferences, perceptions on their effectiveness, nets distribution campaigns, etc) - If wall liners is mentioned query where they received information about it how and why they think it is better compared to nets   Ask how it is important/ priority to protect from malaria  Uliza umuhimu/ haja/ kipaumbele wa kujikinga na malaria   - If malaria prevention appears not as important probe for reasons - Probe on the discrepancies between prevention measures and their none use |
| Perception on costs in malaria control | What are the costs? |
| Project sensitization process | Ask if he has received any information about incoming project research for the control of mosquitoes that transmit malaria.  What is your opinion regarding the sensitization process conducted by researchers before the commencement of wall liners installation in your houses for mosquito control?   - Whether information about the project has reached them - What information they received - How do they feel they were well involved to participate   Do you think community members have well received the research project on wall liners installment for mosquito control?   - *What did you think would be the benefits and disadvantages of being in the trial?* |
| Opinion on the proposed project main tool | Explain to the respondent about what the project is about to introduce (wall liners) and here his/her opinion on the method?  Probes: whether they prefer the tool better, concurrently, or without the use of bed-nets (let it come out during the discussion)  Specifically, comparatively to LLINs which do you think will be best to protect the household members from mosquitoes and malaria? |
| **Now I’d like to ask you a few questions more focused on the study and its participants (***for research staff- Installers, supervisors, village leaders and healthcare staff only***)** | |
| Perceptions of impact of study participation | 1. What impact do you think this study can have on participants’ knowledge or attitudes to malaria prevention?  - *Prompt for any perceived change in participants’ knowledge or behaviour.* - *Prompt for reasons behind this.* |
| 1. What impact do you think the study can have on the people *not* participating in it, but who live or receive malaria control tools near the study site?  - *Prompt for how people and communities feel about it.* - *Prompt for positive and negative impacts.* |
| Summary and any other questions | *(Summarise the main points of the participant checking their agreement and asking if they have anything more to add).*  Are there any points you think I’ve missed, or any other issues you’d like to talk about regarding malaria and its control measures? |

1. **In-Depth Interview Topic Guide - Installers**

Can I ask you few questions about yourself?

- How old are you?
- Your highest level of education?
- The kind of work before being installer?
- Place of living?

1. What do you understand about the wall liner?

- *Probe to know the understanding about the wall liner, its function, cleanness and time frame of being on the wall.*

2. What can you say about durable wall liners installation activities?

- *Probe the whole installation activities in all villages the work has been done*
- *Probe on the availability of transport for carrying the teams, and working equipment’s from NIMR store to the villages, especially the availability of the required equipment’s.*
- *Probe the time used for house preparations*
- *Cutting of wall liners, and the kind of measurements used in measuring wall liners*
- *Probe to know the distance of wall liner cutting stations*
- *The use of steps*
- *Fixing of nails and its obstacles*
- *Probe on the preservation of working equipment’s in the villages.*
- *Observed challenges if not mentioned*
- *Probe on how the movement of working equipment’s from one working place to the other was done.*

*Probe for any other unexpected logistical challenges.*

3. What is your experience on filling pre and post installation forms?

- *Probe if the filling of pre and post installation forms was an obstacle in the fulfillment of the daily responsibilities.*
- *Probe whether there was additional installation/house information that was not captured that they felt was important.*
- *Do you think filling of the forms was part of your responsibility, why?*

4. What can you say, about the relationships of work during the wall liner installation process?

- *Probe on the relationship with fellow workers.*

*Probe about the job hierarchy and how this could be improved – were they happy with their responsibilities and allocation of other responsibilities to other workers?*

- *Relationship with house owners and villagers in general*
- *Probe if the house owners in any way participated in the preparation of their houses for installation to take place.*
- *Probe if the household members or villagers participated in the installation process*

5. How does the type of the house can contribute on easiness or hardness of your work?

*Probe to know how the type of house or building materials and house size can contribute either easiness or hardness in the installation activities.*

6. How did people talk about the DL installation exercise?

- *Prompt to know how community members have been considering wall liners, and its expected functions*
- *The wearing of protective gears such as overalls, gloves, glasses etc.*

*Probe for any adverse events experienced personally or by other workers or householders.*

7. What other activities were you involved in during the installation exercise?

8. What do you say about the payment of the work you have been done?

- *Probe on the amount preferred to be paid, the manner of payment such as on daily basis, explain why you have provided the answer*
- *Prompt why?*

9. What has contributed the success of your work?

- *Probe to know what has contributed the success of the work*
- *What different has been done to accomplish the exercise, which was not in the agreements/instructions*

10. What should be done/suggestions to improve DL installation exercise in the future?

## **In-Depth Interview Topic Guide for Community health workers (CHW’s - Post installation phase**

1. How did you become a CHW?
   1. Why did you become a CHW?
   2. What did you do before being a CHW?
   3. What are you doing concurrently with CHW?
2. What were your responsibilities/roles in the community before traction?
3. What were your responsibilities during TRAction project?
   1. How many hamlets did you serve during the project? On average how many people did you serve?
   2. What motivated you to work on the project?
4. How did you ensure/ maintain children attendance and family participation in the project?
   1. When did you visit household to remind for follow ups?
   2. How did you ensure those who missed the follow-up date attend the next visit or travel to Ubwari? How did you know that they actually attended?
   3. How did you work to ensure the follow up kids were living in the treated households (having both DL with LLINS).
   4. How much was paid to facilitate or improved your morale?
   5. Who was paying you? (Under what arrangements?)
   6. Was the amount paid adequate in relation to your efforts devoted to the project? If not, how much would you propose?
   7. What in particular made the activity you were involved in a success? - please mention those successes
   8. What challenges did you face in the process of informing parents to attend cohort follow-up?
5. Did you meet a case whereby someone wanted to leave the project and you had to intervene?
   1. What were the reasons for their decisions?
   2. How did you solve/ address the situation?
6. What should be done to improve CHW role in the future projects that may possess more or less similar attributes?

## **In-Depth Interview Topic Guide for Project staff - Post installation phase**

1. What was your position and your responsibilities/roles in the Traction project?
2. Can you explain how you supported the effective enrollment of children in the project?
   1. Probes: What sensitization mechanism was in place apart from the overall sensitization?
   2. How did you ensure the participation of both the mother and father in the consenting process?
3. How did you do to ensure the EPI team and CHW’s coordination activities were implemented according to plans? Probes: Communication channels used; incentives etc
   1. What worked well to ensure mothers and fathers participated in the project until the end?
   2. How did you ensure the enrolled children on Cohort follow-ups do not miss the follow ups?
   3. How did you ensure CHWs continued to provide unwavering support to the project activities?
4. How did you ensure the missed-follow up kids had to come at NIMR office for the tests?
5. What did you do to ensure the enrolled children were using DL and ITNS?
6. Did you meet a case whereby someone wanted to leave the project and you had to intervene?
   1. What were the reasons for their decisions?
   2. How did you address the situation?
7. Did you come in to contact with someone who experienced severe adverse event?
   1. Yes/no, how did you deal with it?
   2. Do you think in one way or the other some adverse events had to do with some refusals to enroll or continue to participate in the study for those who had already enrolled? if the answer is yes, explain
   3. How did you mediate refusals associated with adverse events in the cohort children enrollment? What strategies worked well and why do you think they worked?
8. What challenges did you face in the implementation of your roles? How did you address them?
   1. What should be done to improve the future studies which has to involve Community health workers? Probes: How to engage them; support level i.e. incentives; communication channels
   2. Probe what should be done to improve future studies that involve participation of children in field trials
9. **In-Depth Interview Topic Guide- For Supervisors**

Can I ask you few questions about yourself?

- How old are you?
- Your highest level of education?
- The kind of work before being installer
- Place of living

1. What do you understand about wall liner?

- *Probe to know the understanding about wall liner, its function, clean less and time frame of being on the wall.*

2. How do you speak about the supervision work in the DL installation exercise in Muheza District?

- *Probe on the observed simplicity and complexity of house identification before the installation process*
- *The collection and sending of data, especially the number of installed households per day*
- *Probe on the availability of working equipment’s in the whole installation exercise*
- *Is there any complexity/simplicity in supervision of DL installation exercise?*
- *Probe to know if they encountered with any complexity or simplicity in supervising DL installation exercise*

3. Tell me your experience of explaining and filling consent forms before the installation process.

- *Probe the time used to read, explaining and filling consent forms*
- *Experience on the measurements unit used on the material cuts such as foot, centimeter or meters.*
- *Probe on the preservation of working equipment’s in the villages.*

4. What is your experience of examining the DL installed household and filled pre and post installation forms

- *Probe if there were any observed challenges on the examination of the forms and installed house.*

5. What are other activities you have been involving with during the installation process?

6. How do you speak about the relationship during the wall liner installation process?

- *Probe on the relationship with fellow workers*
- *Relationship with house owners and villagers in general*
- *Probe if the house owners in any way participated in the preparation of their houses for installation to take place.*
- *Probe if the household members or villagers participated in the installation process*

7. How does the type of the house contribute to easiness or toughness of your work?

- *Probe to know how the type of house or building materials can contribute either easiness or hardness in the installation activities.*

8. How do people talk about DL installation exercise?

- *Prompt to know how community members have been considering wall liners, and its expected functions (the use of bed nets together with LLINS)*
- *The wearing of protective gears such as overalls, gloves, glasses etc.*

9. Tell me your experience on material and working equipment’s storage in all villages you worked

- *Probe to know if there were any success or challenges on material and working equipment’s storage*
- *How did you handle the situation?*

10. Why do you think some people accepted DL installation in their houses while other did not in the villages you have been working?

- *Probe to know some reasons which have contributed to the refusals of DL installation to some houses*

11. How did you deal with people who have been refusing to have DL in their houses?

- *Probe to know if they encountered with any refusals in the DL installation exercise and how they dealt with it*

12. What do you say about the payment of the work you have been doing?

- *Probe on the amount preferred to be paid, the manner of payment such as on daily basis, explain why you have provided the answer*

*Prompt why?*

13. What has contributed the success of your work?

- *Probe to know what has contributed the success of the work*
- *What different has been done to accomplish the exercise, which was not in the agreements/instructions*

14. What should be done/suggestions to improve DL installation exercise in the future?
